# Supplementary material for: Characteristics and evolution of diurnal foehn events in the Dead Sea valley
Source: Copernicus journal article supplement (doi:10.5194/acp-18-18169-2018), 2018-12-21
Supplement: Supplementary file 1 [file acp-18-18169-2018-supplement.zip]

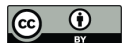

*Supplement of*

## **Characteristics and evolution of diurnal foehn events in the Dead Sea valley**

**Jutta Vuellers et al.**

*Correspondence to:* Jutta Vuellers ([jutta.vuellers@kit.edu](mailto:jutta.vuellers@kit.edu))

- [acp-18-18169-2018-supplement-title-page.pdf](#)
- [20140816\\_rhi\\_hydraulicump.avi](#)

The copyright of individual parts of the supplement might differ from the CC BY 4.0 License.
